# Supplementary material for: Probing the effect of metal to ligand charge transfer on the oxygen evolution reaction in Au incorporated Co(OH)2 thin film electrocatalysts
Source: Royal Society of Chemistry journal article supplement (doi:10.1039/d3ta03923d), 2023-01-01
Supplement: d3ta03923d1.pdf [file d3ta03923d1.pdf]

# 1 Probing the Effect of Metal to Ligand Charge Transfer on the Oxygen 2 Evolution Reaction in Au Incorporated Co(OH)<sub>2</sub> Thin Film Electrocatalysts

3 Rusha Kamar,<sup>a,b</sup> Roland Agoston,<sup>a</sup> Grant A. van Riessen,<sup>c</sup> Gerard Hinsley,<sup>d</sup> Anthony P. O'Mullane,<sup>a,b</sup> and Michael  
4 W. M. Jones<sup>\*a,b,e</sup>

5 <sup>a</sup>. School of Chemistry and Physics, Queensland University of Technology (QUT), Brisbane, Queensland, Australia.

6 <sup>b</sup>. Centre of Materials Science, Queensland University of Technology (QUT), Brisbane, Queensland, Australia.

7 <sup>c</sup>. Department of Mathematical and Physical Sciences, School of Computing, Engineering and Mathematical Science, La Trobe University, Bundoora,  
8 Victoria 3086, Australia.

9 <sup>d</sup>. Deutsches Elektronen Synchrotron DESY

10 <sup>e</sup>. Central Analytical Research Facility (CARF), Queensland University of Technology (QUT), Brisbane, Queensland, Australia

## 11 Supporting Information

### 12 13 14 Sample preparation and electrochemical experiments:

15 Three solutions were prepared in three separate 25 ml volumetric flasks. 10 mM Co(NO<sub>3</sub>)<sub>2</sub> was prepared from Co(NO<sub>3</sub>)<sub>2</sub>·6H<sub>2</sub>O.  
16 0.0726g of the salt was taken in a 25 ml volumetric flask and dissolved in water. In another 25 ml volumetric flask 0.0726g  
17 of Co(NO<sub>3</sub>)<sub>2</sub>·6H<sub>2</sub>O and 0.0139g of KAuBr<sub>4</sub>·H<sub>2</sub>O were taken and dissolved in water to prepare a Au incorporated Co(NO<sub>3</sub>)<sub>2</sub>  
18 solution where the concentration of Au was 10% of Co concentration. 1mM Au solution was prepared from dissolving  
19 0.0139g of KAuBr<sub>4</sub>·H<sub>2</sub>O in a third 25 ml volumetric flask. Co(OH)<sub>2</sub>, Co(OH)<sub>2</sub>-Au were electrodeposited on three types of  
20 substrates according to the following table:

21  
22 Table S1: Sample preparation

| Sample                  | Substrate                                        | Deposition time | Experiment name                 |
|-------------------------|--------------------------------------------------|-----------------|---------------------------------|
| Co(OH) <sub>2</sub>     | Glassy carbon stick electrode                    | 60s             | All electrochemical experiments |
|                         | Pt coated Silicon wafer                          | 60s             | XPS, TEM                        |
| Co(OH) <sub>2</sub> -Au | Pt coated Silicon wafer                          | 300s            | SEM, EDX, XRD                   |
|                         | Pt coated Si <sub>3</sub> N <sub>4</sub> windows | 60s             | NEXAFS                          |

23  
24 Au film was deposited on glassy carbon stick electrode and Pt coated Silicon wafer only, to perform cyclic voltammetry and  
25 XPS (Figure 1 and 4).

26 The Si wafer and the Si<sub>3</sub>N<sub>4</sub> windows were first coated with a 2nm Ti adhesive layer followed by a 10nm Pt layer by electron  
27 beam to increase their conductivity. The films were electrodeposited from the prepared solutions using a potentiostat in a  
28 typical three electrode system where a Ag/AgCl electrode was used as the reference electrode and Pt wire was used as  
29 counter. Applied voltage for the electrodeposition was -1.05V vs Ag/AgCl. After deposition the films were subjected to OER  
30 at 0.75V vs Ag/AgCl for 4 hrs in 0.1M NaOH solution. Au films were not subjected to the 4 hr OER. Cyclic voltammograms  
31 (CV) for Co(OH)<sub>2</sub>, Co(OH)<sub>2</sub>-Au and Au films were recorded between a range of 0.9 – 1.66 V (vs RHE) at a sweep rate of 20  
32 mVs<sup>-1</sup> in 0.1 M NaOH to measure their electrochemical performance. To measure electrochemical surface area (ECSA) CV  
33 was performed on Co(OH)<sub>2</sub> and Co(OH)<sub>2</sub>-Au films at various scan rates in the double layer charging region of both films.

34  
35

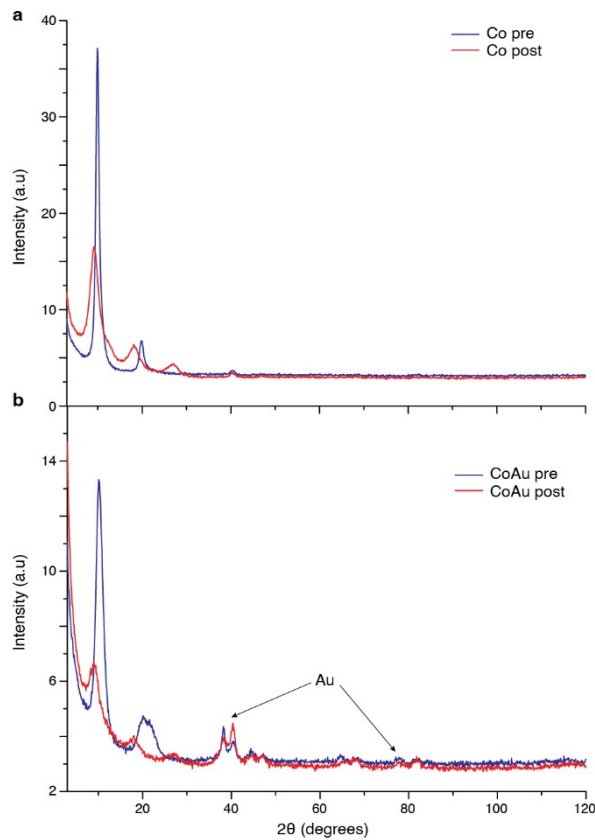

36  
37  
38  
39  
40

Figure S1: XRD images of (a) Co(OH)<sub>2</sub> and (b) Co(OH)<sub>2</sub>-Au films before and after the OER show presence of crystalline Au *hkl*-111 and *hkl*-311 planes at 2θ of 38° and 77°.<sup>1</sup>

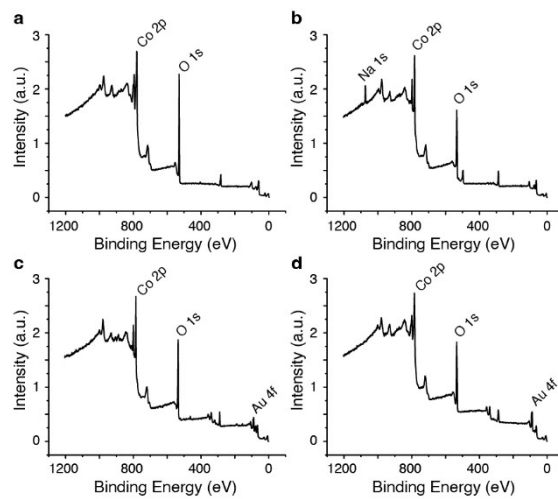

41  
42

43 Figure S2: XPS survey scans of (a) Co(OH)<sub>2</sub> pre, (b) Co(OH)<sub>2</sub> post, (c) Co(OH)<sub>2</sub>-Au pre and (d) Co(OH)<sub>2</sub>-Au post OER films show  
44 presence of Co 2p, O 1s in all four films, Na 1s in Co post and Au 4f in Co(OH)<sub>2</sub>-Au films.

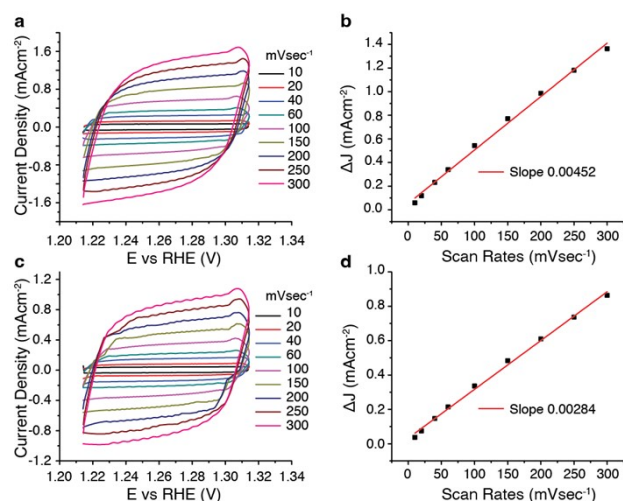

45

46

47 Figure S3. (a) and (c) Cyclic voltammograms recorded for Co(OH)<sub>2</sub> and Co(OH)<sub>2</sub>-Au films in 0.1M NaOH at various scan rates  
 48 in the double layer charging region. (b) and (d) Plots of capacitive current obtained at 1.26 V vs RHE against sweep rate.

49

50 The surface area was determined from the slope of the plots in Figure S3 (b) and (d) which is given below in Table S2. The  
 51 electrochemically active surface area was calculated by assuming that a flat surface has a specific capacitance of 40 μFcm<sup>-2</sup>  
 52 for Co(OH)<sub>2</sub>.<sup>2</sup>

53

54 Table S2. Electrochemically active surface area of Co and CoAu thin films.

| Sample                  | Slope   | ECSA (cm <sup>2</sup> ) |
|-------------------------|---------|-------------------------|
| Co(OH) <sub>2</sub>     | 0.00452 | 113                     |
| Co(OH) <sub>2</sub> -Au | 0.00284 | 71                      |

55

56

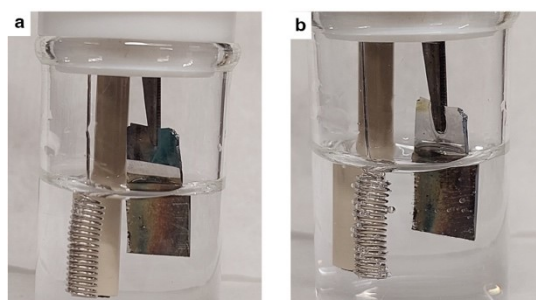

57

58 Figure S4: (a) Electrodeposited Co(OH)<sub>2</sub>-Au film on Si wafer submerged in 0.1M NaOH before applying voltage, (b) Oxygen  
 59 bubbles accumulating on the Co(OH)<sub>2</sub>-Au film surface after applying the voltage for OER.

## 60 References

61

1. G. Geng, P. Chen, B. Guan, Y. Liu, C. Yang, N. Wang and M. Liu, *RSC advances*, 2017, **7**, 51838-51846.

62

2. H. Deng, C. Zhang, Y. Xie, T. Tumlin, L. Giri, S. P. Karna and J. Lin, *Journal of Materials Chemistry A*, 2016, **4**, 6824-6830.

63

64
